# Supplementary material for: Deceleration of thermal ring closure in a glass-forming mexylaminotriazine-substituted merocyanine (MC) linked to intramolecular hydrogen bonding
Source: Royal Society of Chemistry journal article supplement (doi:10.1039/c6nj03368g), 2016-12-22
Supplement: c6nj03368g1.pdf [file c6nj03368g1.pdf]

**Deceleration of thermal ring closure in a glass-forming  
mexylaminotriazine-substituted merocyanine (MC) linked to  
intramolecular hydrogen bonding**

**Supporting Information**

**Konrad Piskorz,<sup>a</sup> Julian M. Dust,<sup>b</sup> Erwin Buncel,<sup>a</sup> Olivier Lebel,<sup>c,\*</sup> and Jean-  
Michel Nunzi<sup>a,d,\*</sup>**

<sup>a</sup> Department of Chemistry, Queens University, Kingston, ON, K7L 3N6 Canada

<sup>b</sup> Department of Chemistry and Environmental Science, Grenfell Campus, Memorial  
University of Newfoundland, Corner Brook, NL, A2H 5G4, Canada

<sup>c</sup> Department of Chemistry and Chemical Engineering, Royal Military College,  
Kingston, ON, K7K 7B4, Canada

<sup>d</sup> Department of Physics, Engineering Physics and Astronomy, Queens University,  
Kingston, ON, K7L 3N6 Canada

Corresponding author email: [nunzija@queensu.ca](mailto:nunzija@queensu.ca), [Olivier.Lebel@rmc.ca](mailto:Olivier.Lebel@rmc.ca)

a)

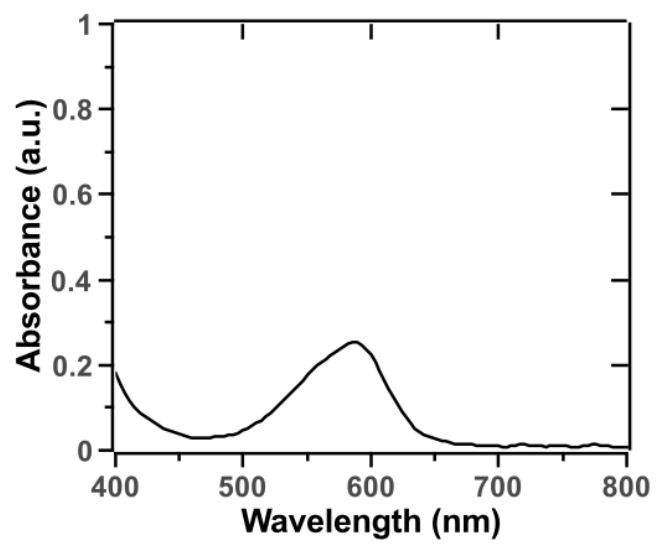

b)

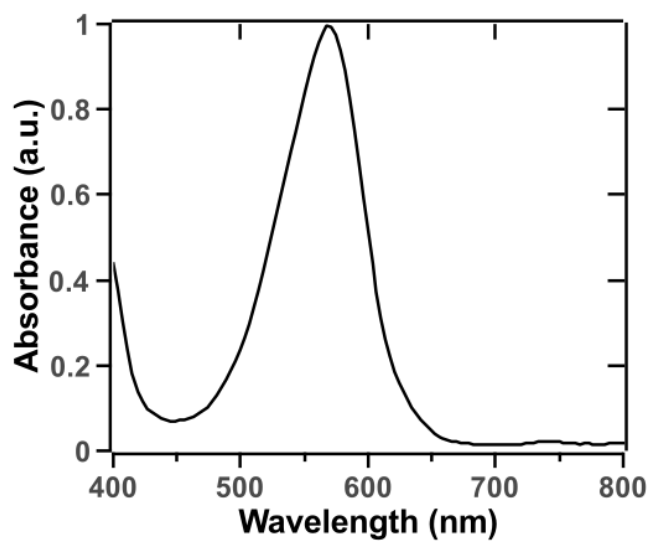

c)

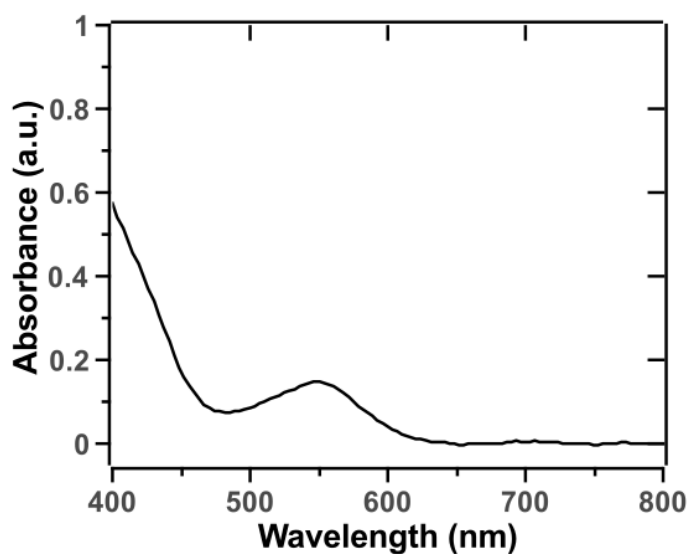

**Figure S1.** Visible spectra of merocyanine **5a** in various solvents ( $4 \times 10^{-5}$ M), recorded after 90s irradiation. a) Toluene, 30 °C; b) THF, -20 °C; c) 1-Propanol, 20 °C.

**Table S1.** Arrhenius data for the ring closure reaction of MC **5a** in toluene.

| T (°C) | T (K) | 1/T (K <sup>-1</sup> ) | ln k <sub>5a</sub> | k <sub>5a</sub>       |
|--------|-------|------------------------|--------------------|-----------------------|
| 10.0   | 283.2 | 0.003521               | -5.708             | $3.32 \times 10^{-3}$ |
| 20.0   | 293.2 | 0.003411               | -4.500             | $1.11 \times 10^{-2}$ |
| 30.0   | 303.2 | 0.003298               | -3.583             | $2.78 \times 10^{-2}$ |
| 40.0   | 313.2 | 0.003193               | -2.500             | $8.21 \times 10^{-2}$ |
| 50.0   | 323.2 | 0.003095               | -1.583             | $2.01 \times 10^{-1}$ |

**Table S2.** Arrhenius data for the ring closure reaction of MC **5a** in THF.

| T (°C) | K     | 1/T (K <sup>-1</sup> ) | ln k <sub>5a</sub> | k <sub>5a</sub>       |
|--------|-------|------------------------|--------------------|-----------------------|
| 0.0    | 273.2 | 0.003661               | -7.587             | $5.07 \times 10^{-4}$ |
| 10.0   | 283.2 | 0.003531               | -5.973             | $2.55 \times 10^{-3}$ |
| 20.0   | 293.2 | 0.003411               | -4.643             | $9.63 \times 10^{-3}$ |

|      |       |          |        |                       |
|------|-------|----------|--------|-----------------------|
| 30.0 | 303.2 | 0.003298 | -3.601 | $2.73 \times 10^{-2}$ |
| 40.0 | 313.2 | 0.003193 | -2.191 | $1.12 \times 10^{-1}$ |
| 50.0 | 323.2 | 0.003095 | -1.242 | $2.89 \times 10^{-1}$ |

**Table S3.** Arrhenius data for the ring closure reaction of MC **5a** in DMF.

| T (°C) | K     | 1/T (K <sup>-1</sup> ) | ln k <sub>5a</sub> | k <sub>5a</sub>       |
|--------|-------|------------------------|--------------------|-----------------------|
| -15.0  | 258.2 | 0.003874               | -11.55             | $9.64 \times 10^{-6}$ |
| 0.0    | 273.2 | 0.003661               | -9.369             | $8.53 \times 10^{-5}$ |
| 10.0   | 283.2 | 0.003531               | -7.126             | $8.04 \times 10^{-4}$ |
| 25.0   | 298.2 | 0.003540               | -5.830             | $2.94 \times 10^{-3}$ |
| 30.0   | 303.2 | 0.003298               | -5.056             | $6.37 \times 10^{-3}$ |
| 40.0   | 313.2 | 0.003193               | -4.211             | $1.48 \times 10^{-2}$ |
| 50.0   | 323.2 | 0.003095               | -2.634             | $7.18 \times 10^{-2}$ |

**Table S4.** Arrhenius data for the ring closure reaction of MC **5a** in 1-propanol.

| T (°C) | K     | 1/T (K <sup>-1</sup> ) | ln k <sub>5a</sub> | k <sub>5a</sub>       |
|--------|-------|------------------------|--------------------|-----------------------|
| 20.0   | 293.2 | 0.003411               | -6.870             | $1.04 \times 10^{-3}$ |
| 25.0   | 298.2 | 0.003540               | -6.174             | $2.08 \times 10^{-3}$ |
| 40.0   | 313.2 | 0.003193               | -4.522             | $1.09 \times 10^{-2}$ |
| 50.0   | 323.2 | 0.003095               | -3.391             | $3.37 \times 10^{-2}$ |

a)

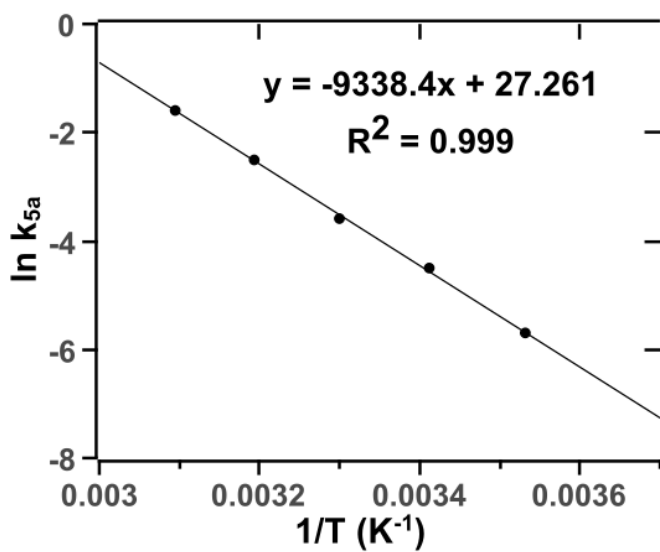

b)

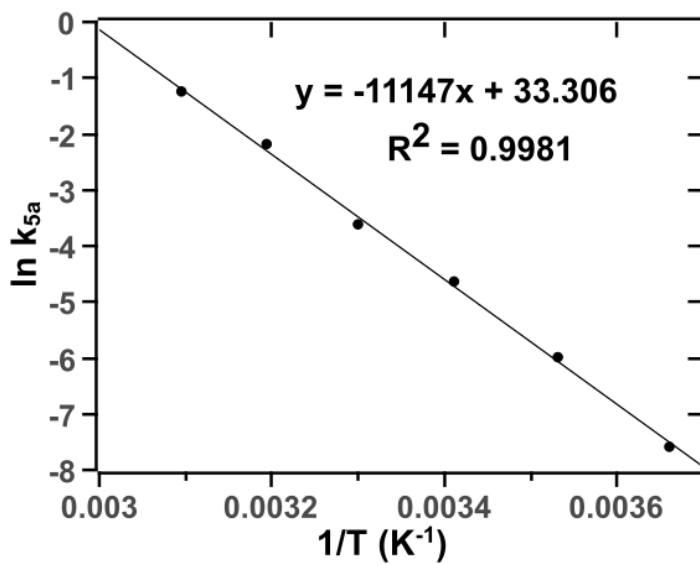

c)

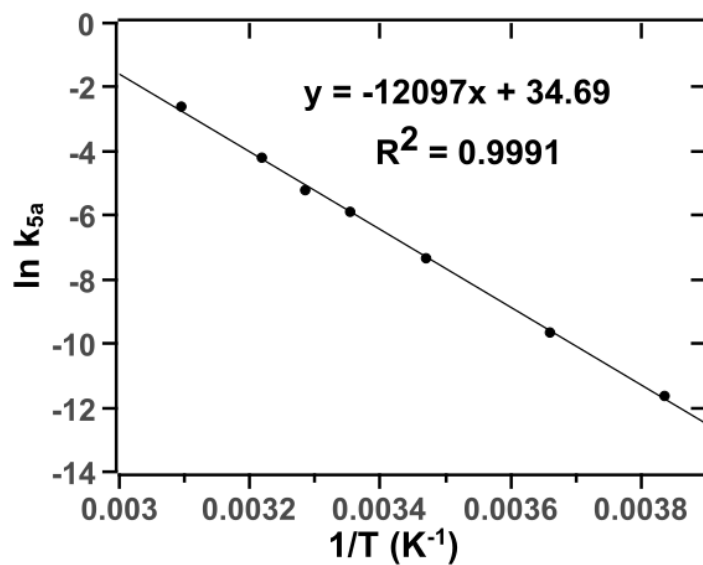

d)

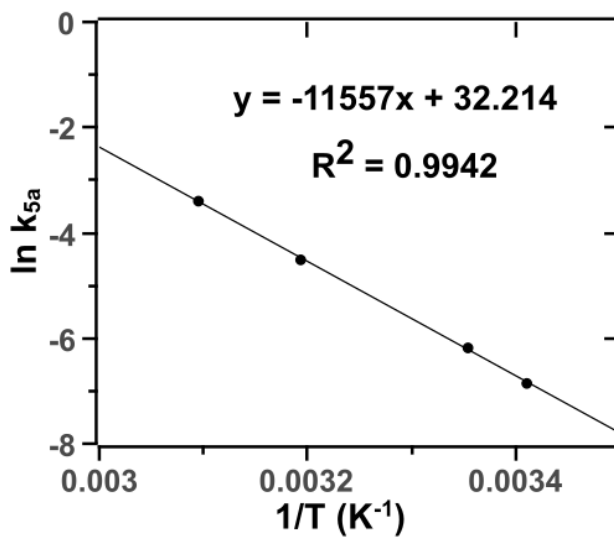

**Figure S2.** Arrhenius plots for the ring closure reaction of MC **5a**. a) Toluene; b) THF; c) DMF; d) 1-propanol.

**Figure S3.** NMR spectra of SP **5**. a)  $^1H$  spectrum; b)  $^{13}C$  spectrum; c) HSQC spectrum.

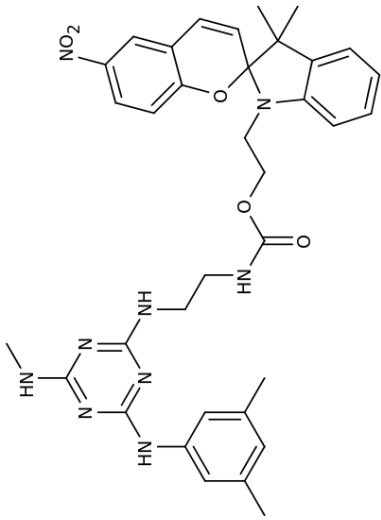

363 K

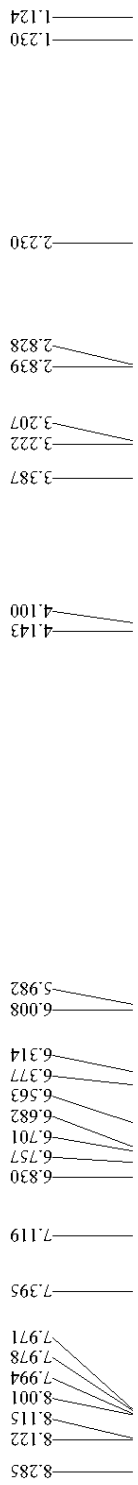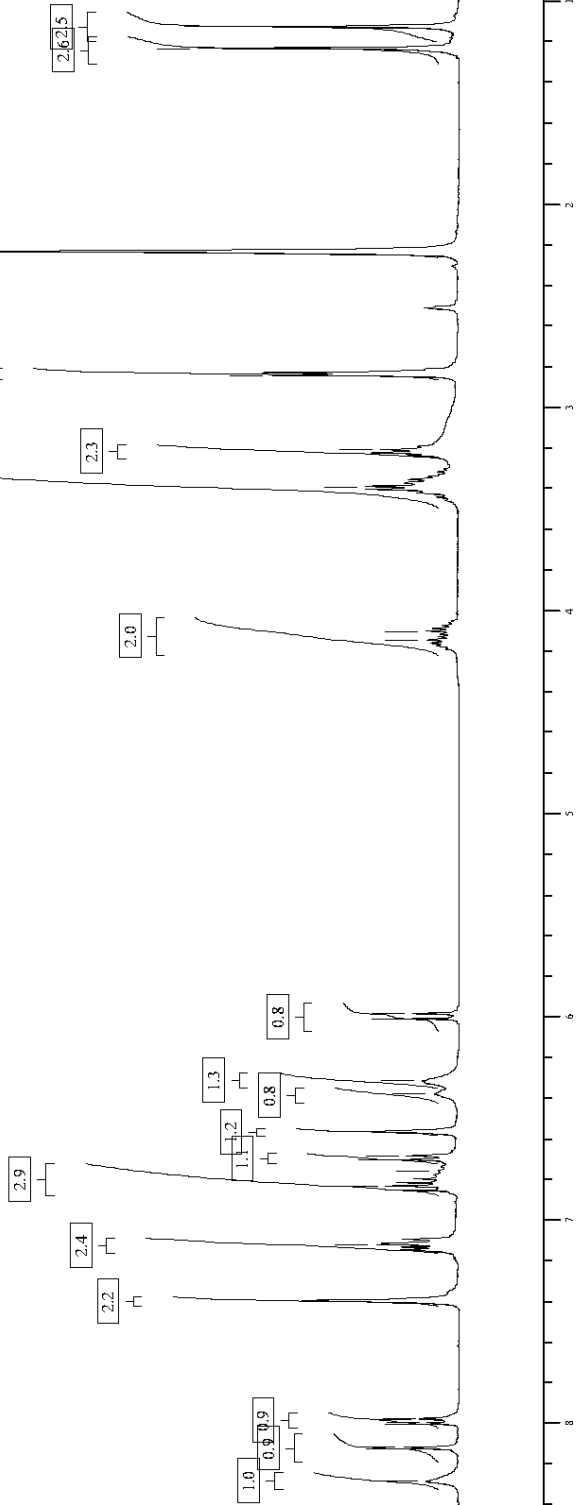

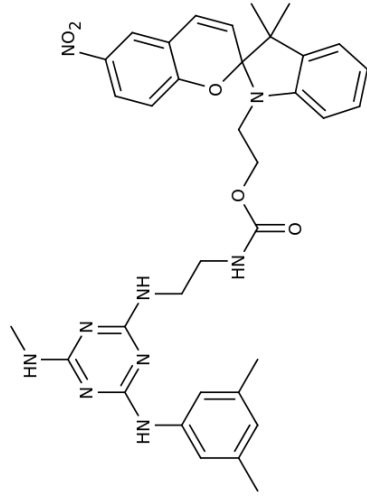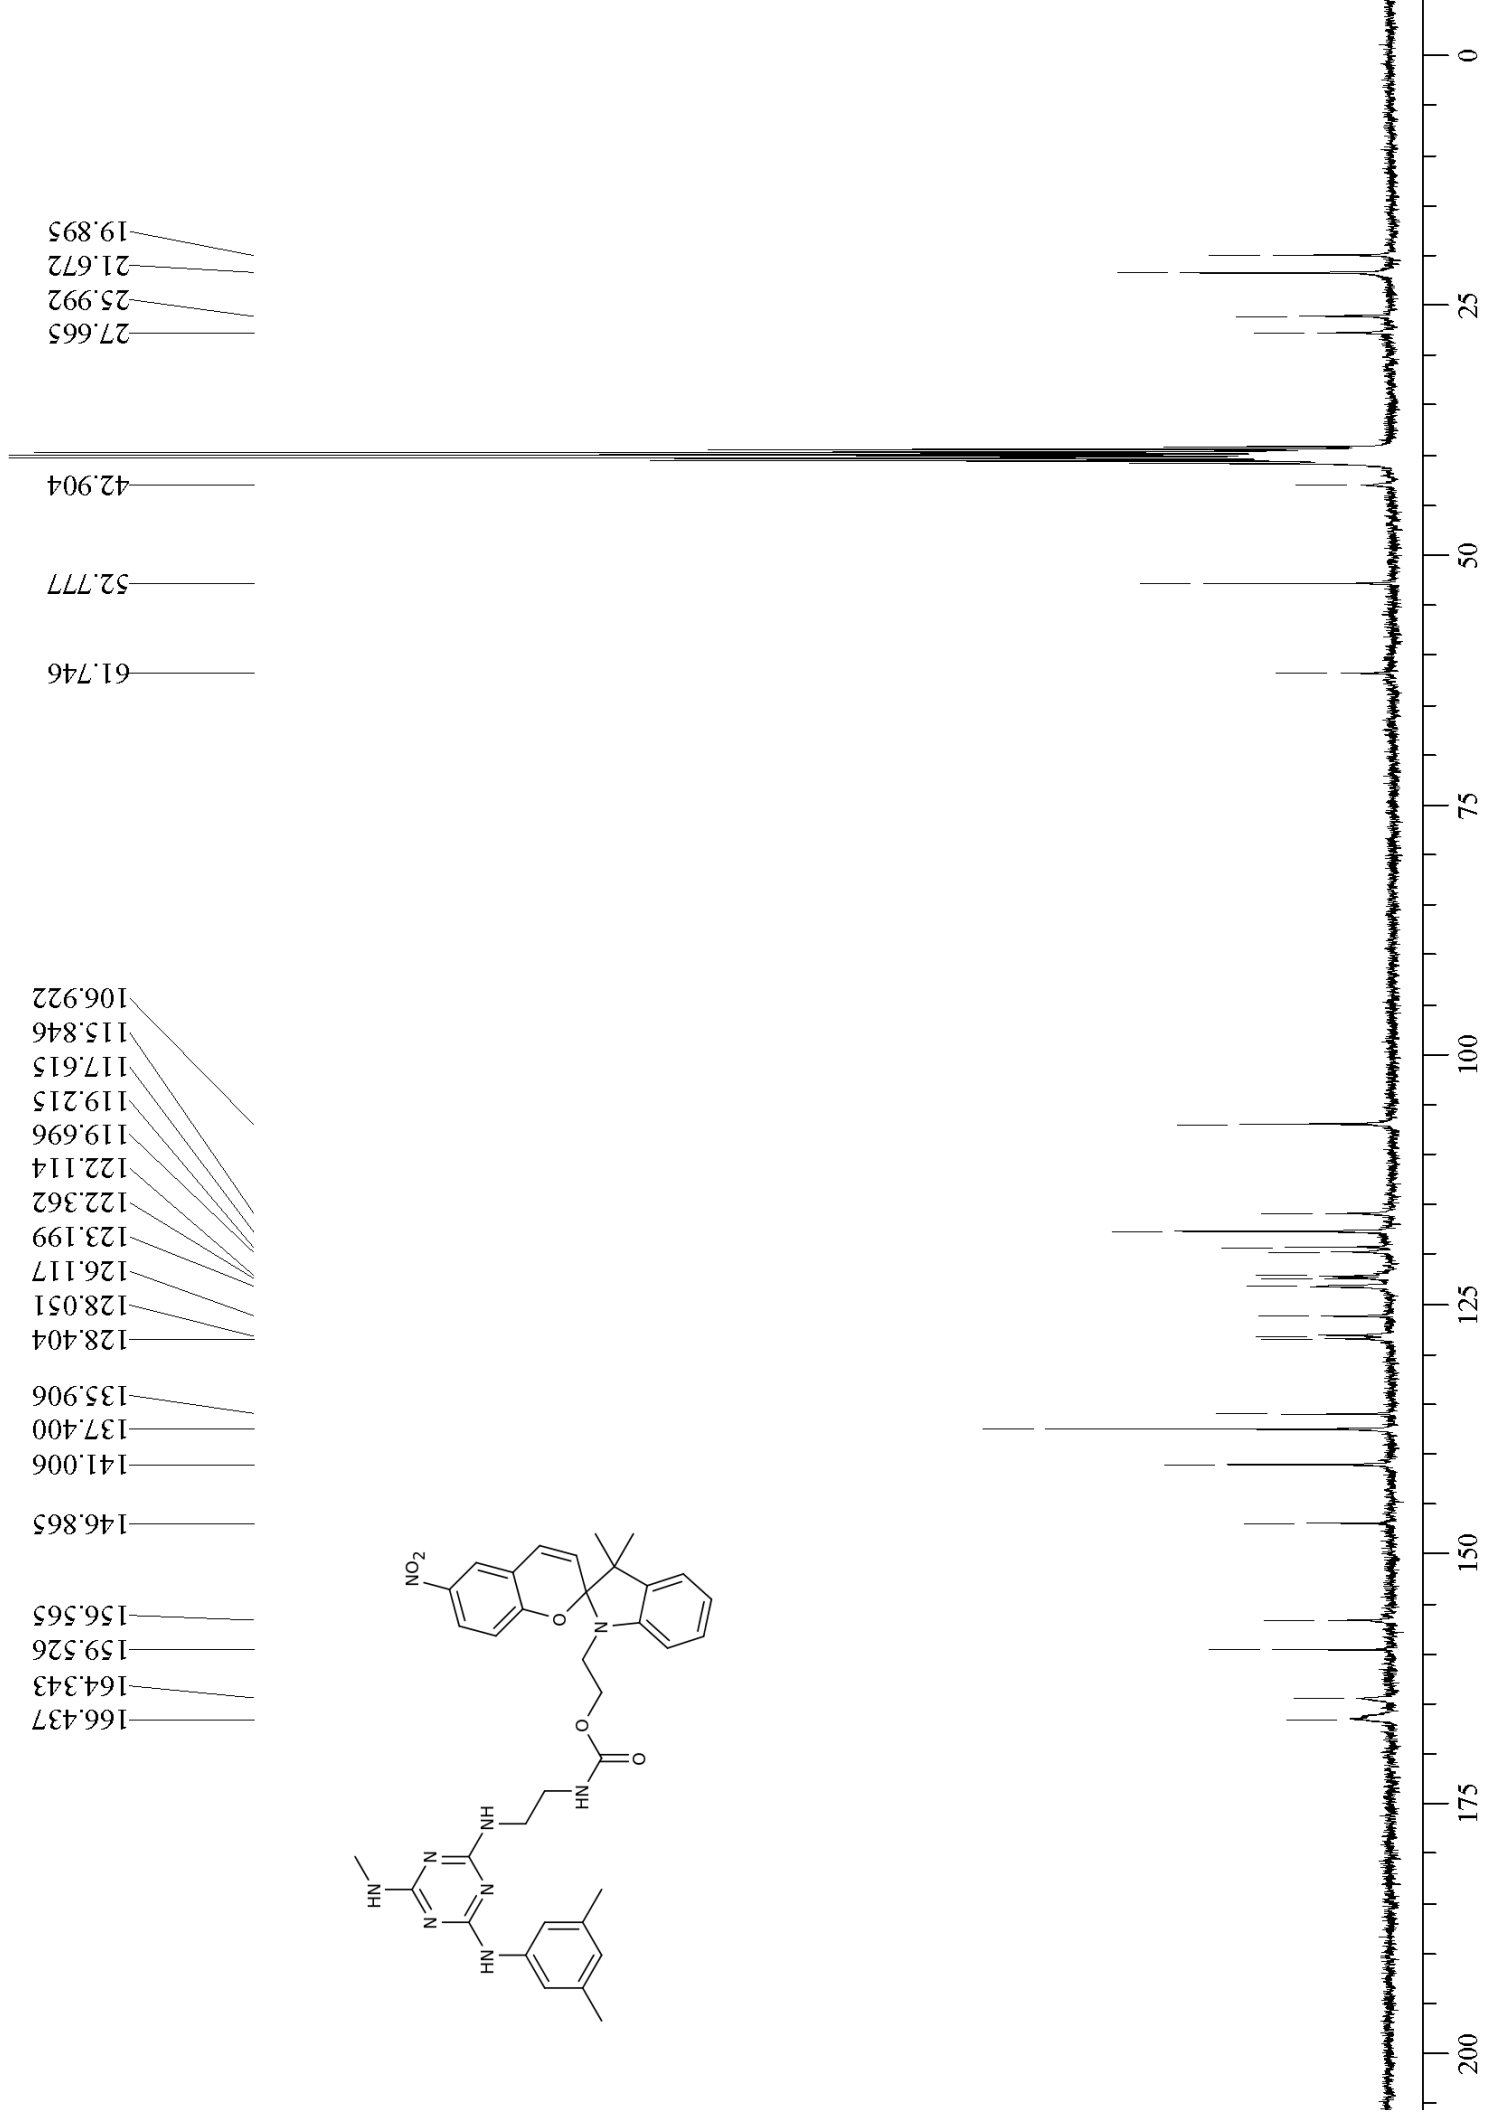



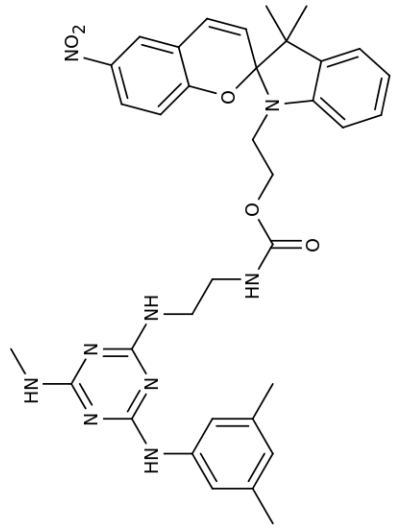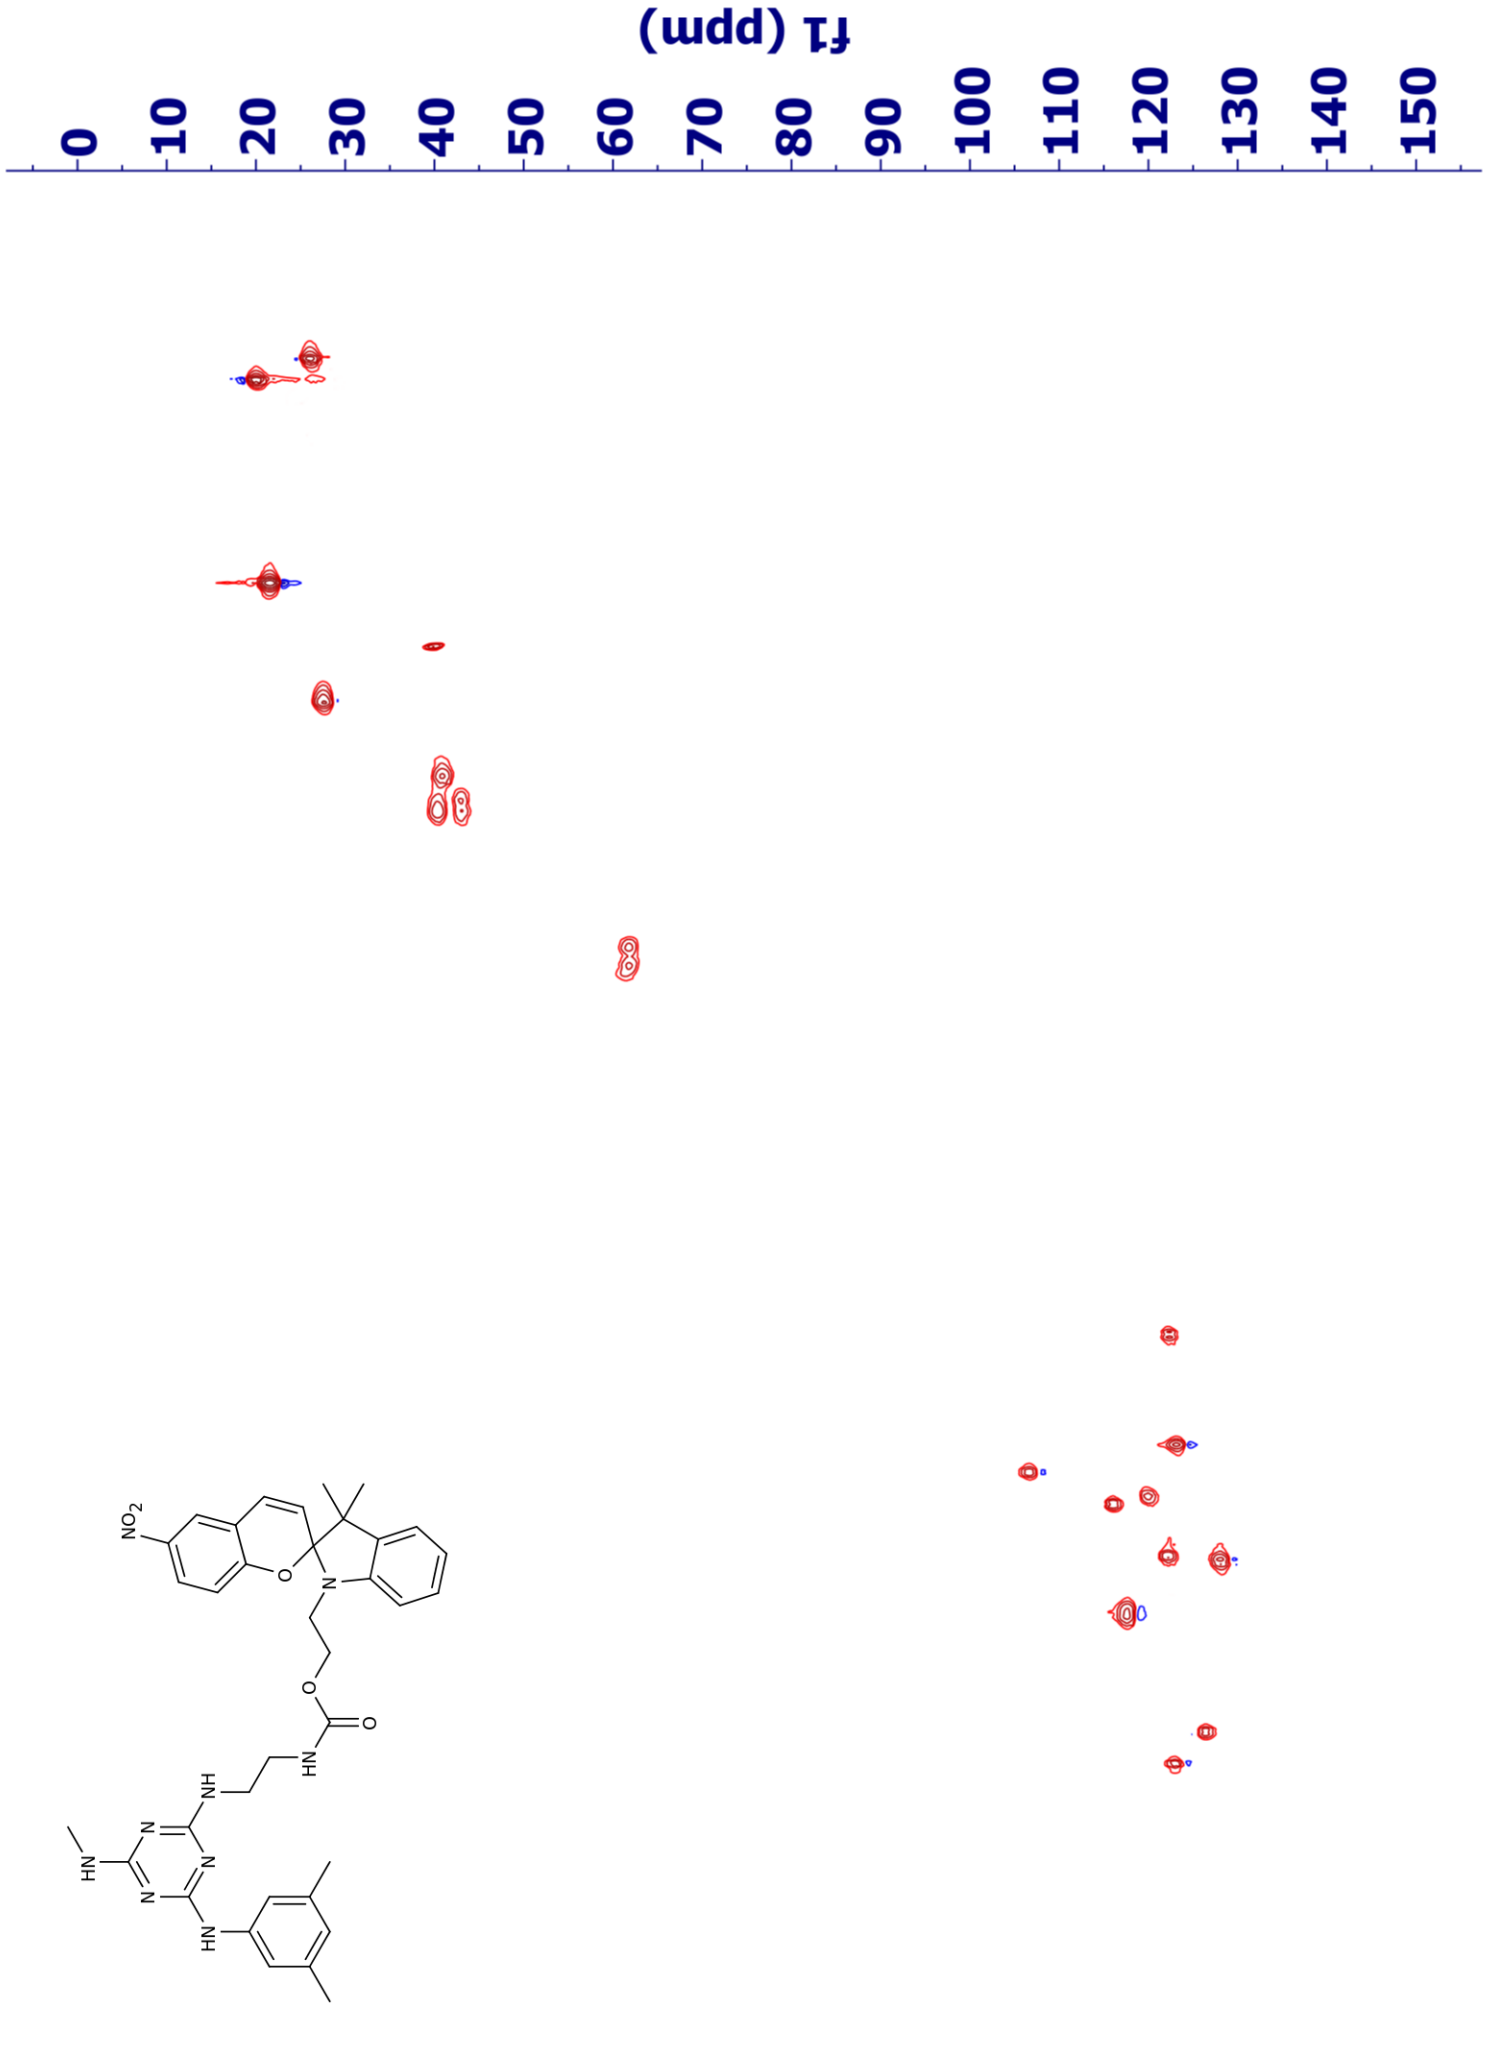

0.5 1.0 1.5 2.0 2.5 3.0 3.5 4.0 4.5 5.0 5.5 6.0 6.5 7.0 7.5 8.0 8.5 9.0
